1 TITLE PAGE

2 MANUSCRIPT: Original Research

3

4 **Title: “Creating a culturally competent pharmacy profession”: a qualitative exploration of**  
5 **pharmacy staff perspectives of cultural competence and its training in community**  
6 **pharmacy settings.**

7

8 **Author names and affiliations:**

9 Jessica McCann<sup>1</sup>, Wing Man Lau<sup>1</sup>, Andy Husband<sup>1,2</sup>, Adam Todd<sup>1,2</sup>, Laura Sile<sup>3</sup>, Amandeep Kaur Doll<sup>4</sup>, Sneha  
10 Varia<sup>5</sup>, Anna Robinson-Barella<sup>1,2\*</sup>

11

12 <sup>1</sup>School of Pharmacy, Newcastle University, King George VI Building, Newcastle upon Tyne, NE1 7RU.

13 <sup>2</sup>Population Health Sciences Institute, Newcastle University, Baddiley Clark Building, Newcastle upon Tyne, NE2  
14 4BN.

15 <sup>3</sup>Alumni, School of Pharmacy, Liverpool John Moore University, James Parsons Building, Liverpool, L3 3AF.

16 <sup>4</sup>The Royal Pharmaceutical Society, London, E1W, 1AW.

17 <sup>5</sup>Centre for Pharmacy Postgraduate Education, School of Health Sciences, University of Manchester, M13 9PT.

18

19 \*corresponding author

20

21 **ABSTRACT**

22

23 **Introduction**

24 Cultural competence is an important attribute underpinning interactions between healthcare  
25 professionals, such as pharmacists, and patients from ethnic minority communities. Health- and  
26 medicines-related inequalities affecting people from underrepresented ethnic groups, such as  
27 poorer access to healthcare services and poorer overall treatment outcomes in comparison to their  
28 White counterparts, have been widely discussed in existing literature. Community pharmacies are a  
29 first port of call healthcare service accessed by diverse patient populations; yet, limited research  
30 exists which explores the perceptions of culturally competent care within the profession, or the  
31 delivery of cultural competence training to community pharmacy staff. This research seeks to gather  
32 perspectives of community pharmacy teams relating to cultural competence and identify possible  
33 approaches for the adoption of cultural competence training.

34

35 **Methods**

36 Semi-structured interviews were conducted in-person, over the telephone or *via* video call, between  
37 October-December 2022. Perspectives on cultural competence and training were discussed.  
38 Interviews were audio-recorded and transcribed verbatim. Reflexive thematic analysis enabled the  
39 development of themes. QSR NVivo (Version 12) facilitated data management. Ethical approval was  
40 obtained from the [anonymised] University Ethics Committee (ref: 25680/2022).

41

42 **Results**

43 Fourteen participants working in community pharmacies were interviewed, including: 8 qualified  
44 pharmacists, 1 foundation trainee pharmacist, 3 pharmacy technicians/dispensers and 2 counter  
45 assistants. Three themes were developed from the data which centred on: (1) defining and  
46 appreciating cultural competency within pharmacy services; (2) identifying pharmacies as “cultural

47 hubs” for members of the diverse, local community; and (3) delivering cultural competence training  
48 for the pharmacy profession.

49

#### 50 **Conclusion**

51 The results of this study offer new insights and suggestions on the delivery of cultural competence  
52 training to community pharmacy staff, students and trainees entering the profession. Collaborative  
53 co-design approaches between patients and pharmacy staff could enable improved design,  
54 implementation and delivery of culturally competent pharmacy services.

55

#### 56 **Patient or public contribution**

57 The Patient and Public Involvement and Engagement group at [anonymised] University had input in  
58 the study design and conceptualisation. Two patient champions inputted to ensure that the study  
59 was conducted, and the findings were reported, with cultural sensitivity.

60

#### 61 **Trial registration:**

62 Not applicable. Ethical approval was obtained from the [anonymised] University Research and Ethics  
63 Committee (reference: 25680/2022).

64

#### 65 **Key words:**

66 **Cultural competence; pharmacy; community pharmacy; health inequalities; ethnicity; qualitative.**

67

## 68 Introduction

69

70 Cultural competence can be defined as an individual's ability to possess the skills and knowledge to  
71 effectively interact with people from different cultural backgrounds.<sup>1</sup> It involves the  
72 acknowledgement, understanding and appreciation of an individual's cultural identity such as their  
73 religion, ethnicity, nationality, gender and sexual orientation.<sup>2,3</sup> Evidence has demonstrated that  
74 being culturally competent promotes communication between individuals,<sup>4</sup> respect for other  
75 cultures, individual self-awareness<sup>1</sup> and support shared decision-making between individuals.<sup>5</sup>  
76 Therefore, it can be considered a key attribute to those working within the healthcare system.<sup>6</sup>

77

78 The General Pharmaceutical Council Standards for Pharmacy Professionals report demonstrates the  
79 responsibility of pharmacy professionals to *'treat people as equals, with dignity and respect, and*  
80 *meet their own legal responsibilities under equality and human rights legislation, while respecting*  
81 *diversity and cultural differences... (and) assess and respond to the person's particular health risks,*  
82 *taking account of individuals' protected characteristics and background".<sup>7</sup> Similar statements are*  
83 acknowledged in the General Medical Council (GMC) Equality, Diversity and Inclusion Policy, which  
84 ensures that the organisation and all medical professionals *"treat anyone who [we] interact with*  
85 *fairly, without bias or discrimination",<sup>8</sup> and in the principles of good practice for community*  
86 pharmacy teams, to address health inequalities (point 1.2.6) in the National Institute of Health and  
87 Care Excellence Guidance.<sup>9</sup> Despite referring to cultural competence within the guidance from  
88 professional bodies, there remains evidence of healthcare and medicines inequalities affecting  
89 patients belonging to ethnic minority communities.<sup>5,10,11</sup>

90

91 Recent studies have identified several factors which may contribute to these health inequalities,  
92 including poorer health outcomes, lower reported health literacy levels, lower socio-economic  
93 status, and feelings of disempowerment and distrust within the healthcare system for those from

94 underrepresented ethnic communities, compared to their White counterparts.<sup>12,13</sup> Evidence suggests  
95 that one approach of tackling the aforementioned health inequalities could relate to the education  
96 and training of healthcare professionals, particularly developing skills to become culturally  
97 competent.<sup>11,14-16</sup> Govere *et al.* demonstrated that cultural competence training had a positive  
98 impact on cultural awareness and overall competence of healthcare professional consultations,  
99 hence improving rates of patient satisfaction.<sup>14</sup>

100

101 Most knowledge around training of cultural competency within healthcare settings currently focuses  
102 on the fields of nursing, medicine and dentistry. There have been variations in proposed strategies  
103 and frameworks for teaching cultural competence to these healthcare professionals;<sup>17</sup> for example,  
104 including the provision of online, self-directed learning sessions for trainees,<sup>18</sup> as well as face-to-face  
105 workshops and seminars, delivered by trainers.<sup>19-22</sup> One setting within healthcare that encounters a  
106 wide range of culturally diverse patients is community pharmacy. Community pharmacy is regarded  
107 as a vital and easily accessible healthcare setting to any patient who requires health advice and  
108 treatment.<sup>23</sup> A recent study proposed that cultural competence training should be implemented into  
109 the training curriculum of all staff working within community pharmacies;<sup>10</sup> however, limited  
110 research exists on the optimal delivery methods of cultural competence training to meet this  
111 need.<sup>24,25</sup>

112

113 By exploring the perspectives of community pharmacy staff members, this qualitative study aims to:  
114 (i) provide new insights that showcase beliefs and attitudes towards cultural competence within the  
115 pharmacy profession and (ii) identify strategies to implement and deliver training for community  
116 pharmacy staff to use within their culturally diverse places of work.

117

118

## 119 Method

120

### 121 Recruitment and sampling

122

123 The consolidated criteria for reporting qualitative research (COREQ) checklist was followed for this  
124 work (see Multimedia Appendix).<sup>26</sup> Given the capabilities of digital strategies to support qualitative  
125 research, a blended-strategy was applied to perform participant recruitment and data collection  
126 with pragmatism. Recruitment was facilitated by community pharmacies, community charities and  
127 professional networks based in the North East of England, as well as on the social media profiles of  
128 two members of the research team (JMCC and AR-B). All interested participants who contacted the  
129 research team were emailed an information sheet and consent form detailing the purpose and aim  
130 of the research. Those who expressed an interest and gave their written consent, were enrolled to  
131 the study. There was no relationship established between the researcher and participants prior to  
132 study commencement or recruitment. Inclusion criteria comprised: participants over 18-years of age  
133 who held a role within a community pharmacy team working in the UK (including, but not limited,  
134 to: pharmacists, foundation trainee pharmacists, pharmacy technicians, dispensers/dispensing staff  
135 and counter assistants). Purposive sampling was used to recruit participants and ensure  
136 representation from a variation of typical job roles within community pharmacy teams; participants  
137 were also of mixed age ranges, had been qualified in their job role for varying lengths of time and  
138 were from varying ethnic backgrounds.

139

140

### 141 Semi-structured interviews

142

143 In-depth, semi-structured interviews were conducted by one researcher (JMCC, a female pharmacy  
144 student researcher with experience of qualitative research) between October and December 2022.

145 Interviews were conducted either remotely, *via* Zoom® or telephone calls, or in-person (face-to-  
146 face); all participants were offered the choice of which format they would prefer. The semi-  
147 structured interview topic guide (see Supplementary File) was developed based on three pilot  
148 interviews and covered key issues identified in the existing literature,<sup>5,10,11</sup> including participants’  
149 knowledge of cultural competence within pharmacy and wider healthcare settings; participants’  
150 perspectives and experiences of interacting with patients from ethnic minority communities; and  
151 their views and suggestions on cultural competence training. In addition, the topic guide was  
152 informed by findings from a previous qualitative study conducted by the research team<sup>5</sup> and the  
153 lived experiences of patient champions involved as co-authors in this study (LS and AKD).

154

155 Data analysis

156

157 All semi-structured interviews were audio-recorded to enable data analysis. The audio files were  
158 encrypted and transcribed verbatim by JMcC; immediately following transcription, the audio files  
159 were deleted. All interview data were anonymised at the point of transcription and all transcripts  
160 were checked for accuracy and correctness by AR-B. Participants did not provide comment on the  
161 transcripts nor feedback on results.

162

163 Following reflexive thematic analysis processes, as defined by Braun and Clarke,<sup>27,28</sup> the principle of  
164 constant comparison guided an iterative process of data collection and analysis. Reflexive thematic  
165 analysis was performed by two researchers (JMcC and AR-B) to analyse the interview data. Close and  
166 detailed reading of the transcripts allowed the two researchers to familiarise themselves with the  
167 data. Initial descriptive codes were identified in a systematic manner across the data sets; these  
168 were then sorted into common coding patterns, which enabled the development of analytic themes  
169 from the data. The themes were reviewed, refined and named once coherent and distinctive. Two  
170 authors (JMcC and AR-B) performed the data analysis through discussion and, if agreement was not

171 reached, by consensus with the wider research team (LS, AKD, WML, AKH and AT). Post-interview  
172 field notes enhanced this reflective process. NVivo (version 12) software was used to facilitate data  
173 management. The research team were in agreement that data saturation (or data sufficiency and  
174 information power) occurred after conducting 12 semi-structured interviews and thus, study  
175 recruitment stopped following interview number 14.<sup>29</sup> To ensure confidentiality when using direct  
176 patient quotes within this research, non-identifiable pseudonyms are used throughout, *e.g.*,  
177 Participant 1 and Participant 2 *etc.*

178

179 Considerations when reporting participant demographics

180

181 The researchers wished to consider whether there were any connections or associations between  
182 perspectives shared by participants, and their ethnicity. Collecting data on a person's ethnic group is  
183 complex, since ethnicity in itself is a multi-faceted and changing phenomenon.<sup>30</sup> Various ways of  
184 measuring ethnicity exist and could include a person's country of birth, nationality, religion, culture,  
185 language, physical appearance or a combination of all of these aspects.<sup>3,31</sup> Efforts have been taken in  
186 this study to report a multitude of these aspects, to demonstrate the multi-faceted layers that  
187 accompany discussions about ethnicity. The UK Office of National Statistics 'Ethnic group, national  
188 identity and religion',<sup>3</sup> the UK Census Reporting Classification,<sup>32</sup> and the National Institutes of Health  
189 (NIH) 'Racial and Ethnic Categories and Definitions for NIH Diversity Programs and Other Reporting  
190 Purposes'<sup>31</sup> guides were used to inform the reporting of participant ethnicity for this study (as  
191 demonstrated in Table 1). Table 1 also includes a column for self-identified ethnicity and is reported  
192 verbatim from each participant's interview.

193

194

195 Ethical approval

196



197 Ethical approval was obtained from the [anonymised] University Ethics Committee (reference:  
198 25680/2022) and research governance was followed in accordance to [anonymised] University  
199 research policies.

200

201

## 202 Results

203

### 204 Participant demographics

205

206 Fourteen participants in total were recruited and interviewed for this study (participant  
207 characteristics are described in **Table 1**). Of the fourteen participants interviewed; eight described  
208 their job role within community pharmacy as pharmacists (57%), one interviewee was a foundation  
209 trainee pharmacist (8%), three were dispensers/pharmacy technicians (21%) and two were counter  
210 assistants (14%). Ten participants self-reported their ethnicity to be White, with nine stating they  
211 were British and one stating they were Scottish; one participant identified as mixed-race British; two  
212 participants identified as Chinese, and one identified as Pakistani. The average age of the  
213 participants was 30 years (SD  $\pm 8.06$ ). Participants worked within community pharmacy settings  
214 across the UK; specifically, nine participants worked across the regions of Northumberland, Tyne and  
215 Wear (England), three participants worked across Yorkshire (England), two participants stated they  
216 worked in London (England), and one participant worked in Glasgow (Scotland). Nine interviews  
217 were conducted over video call-based software (64%), four interviews were conducted over the  
218 telephone (28%) and one interview was carried out in-person (8%). There were no refusals to  
219 partake, participant drop outs or repeat interviews.

220

221 <Insert Table 1 here>

222 Three overarching themes were developed to reflect the perceptions of community pharmacy staff  
223 on cultural competence and the delivery of cultural competence training within community  
224 pharmacy. These focused on (1) defining and appreciating cultural competency within pharmacy  
225 services; (2) identifying pharmacies as “cultural hubs” for members of the diverse, local community;  
226 and (3) delivering cultural competence training for the pharmacy profession (Figure 1). The three  
227 themes, and their sub-themes, are discussed in turn.

228

229 <Insert Figure 1 here>

230

231

232

233

234

235

236

237

238 Theme 1: Defining and appreciating cultural competency within pharmacy

239

240 *Definitions and understanding*

241 Cultural competence was believed by most participants to relate to the awareness and appreciation  
242 of another person's culture, with one explaining that being culturally competent is *"about*  
243 *understanding and appreciating people from a lot of diverse backgrounds – that are different to*  
244 *yours. So that's whatever ethnicity you are, it's understanding about cultures and upbringing and all*  
245 *the things that make you, you"* (Participant 8). In this sense, cultural competence was interpreted, in  
246 a wider social context, as a skill that an individual can develop through interactions with people from  
247 different cultures. Other participants described cultural competence as a concept relative to health,  
248 and drew on their medicines expertise to address this; they described cultural competence as being  
249 *"inclusive in your treatment of those patients and being able to build that into the way we approach*  
250 *patient care and healthcare decisions"* (Participant 6).

251 *"You've got to be aware of issues such as religion, race or cultural differences that*  
252 *may require a different approach to treating that patient... you know what they*  
253 *can and can't eat for example, you can offer them alternative medication with*  
254 *products that wouldn't be offensive or unacceptable to them"* (Participant 5).

255

256 *Cultural beliefs influencing decisions about medicines*

257 Participants provided examples where it was important to be aware of formulation considerations  
258 and excipients within medications. Specifically, the suitability of capsules containing pork products  
259 for someone practicing religions including Islam or Judaism was discussed, with one participant  
260 stating *"somebody who's Muslim wouldn't be happy with pork products, like gelatine, in their*  
261 *capsules"* (Participant 4). Others also recalled examples of investigating alternative medications to  
262 suit a patient's cultural needs. A pharmacist explained, *"it took me probably a couple of hours to*

263 *source the medication in liquid form... I had to ring manufacturers and contact lots of different*  
264 *companies to try and find an alternative and (pause) it took a lot of time” but they “knew it was*  
265 *super important to them [the patient] and if was me in their shoes, I wouldn’t have taken that*  
266 *medication because it’s not acceptable” (Participant 5). It was acknowledged by many participants*  
267 *that although it may take additional time to source suitable medications for patients, it was*  
268 *important for delivering high quality care, and there was an underpinning belief that these*  
269 *additional considerations would lead to a more individualised approach to patient care.*

270

271 Other participants reflected that the beliefs of certain cultures may impact on an individual’s ability  
272 to engage with healthcare access or medicines-taking. It was suggested that certain cultural beliefs  
273 could pose as barriers to individuals accessing the care that they need, as there may be cultural  
274 stigma surrounding certain health conditions. A pharmacist recalled an example where a Muslim  
275 patient, who was receiving methadone treatment, said he would be *“mortified if a person from their*  
276 *community had seen them” (Participant 4). The pharmacist contemplated that “some people*  
277 *perceive that Muslims don’t drink and therefore it’s unusual for a Muslim to end up on methadone or*  
278 *a dependent substance” (Participant 4). They hinted that patients should not be labelled under*  
279 *common stereotypes and that health professionals should know to provide equal treatment to*  
280 *patients, regardless of their cultural background.*

281 *“I think it’s about being concerned that they [patients] may be stigmatised within*  
282 *their community... or if it’s perhaps not something that’s seen as appropriate in*  
283 *their religion. It’s a little bit about shame, and personal shame and er, feeling like*  
284 *they’re going against the cultural norm for them. I think that stigma could*  
285 *potentially prevent them seeking help for their conditions” (Participant 4).*

286

287 Two participants reflected on experiences of barriers that prevented a person seeking healthcare or  
288 medication advice, because they were *“a female (pharmacy professional) and their (the patient)  
289 religion means they can’t, or shouldn’t, interact with females”* (Participant 5). Suggestions were  
290 given around possible ways to overcome such barriers, even *“how pharmacy regulators could  
291 engage with key members of those communities to try and explain how we can work together to  
292 overcome that”* (Participant 5).

293 *“I think that one of the hardest challenges is where maybe the gender of the  
294 person who delivering the care, is not seen as being appropriate to speak to a  
295 male member of the public and say, ‘It’s ok to engage with a female member of  
296 staff at the pharmacy. You’re not going to get in trouble if you do that”*  
297 *(Participant 5).*

298

299 Theme 2: Identifying pharmacies as “cultural hubs” for members of the diverse local  
300 community

301

302 *Recognising the diversity of populations accessing community pharmacies*

303 Participants discussed that community pharmacies are unique healthcare settings; they are an  
304 accessible *“source of health advice and health care, where you can speak to a qualified professional,  
305 all without requiring an appointment”* (Participant 3). One participant reflected that being a  
306 community pharmacist meant *“you are often the first point of contact like in the community for any  
307 patient”* (Participant 1) and one counter assistant recognised the diversity of patients that attend  
308 community pharmacies, stating *“it’s not always the same ethnicity (within the patients we are  
309 treating) and you’re rarely going to get a pharmacy that only has one ethnicity (in its population)”*  
310 (Participant 12). Participant views across all job roles within community pharmacy described the  
311 potential for interactions with members of a diverse population accessing the pharmacy. One

312 participant viewed the potential for community pharmacies to be regarded as “*cultural hubs*” that  
313 local communities can access, knowing they will “*be recognised and spoken to in way that accounts*  
314 *for them and their culture*” (Participant 11).

315

316 Most of the participants had experience working within various pharmacies across the UK and were  
317 able to recall differences in the level of diversity between the pharmacies on a national-level, as well  
318 as on a local-level. One participant discussed their experience of working as a locum pharmacist  
319 across a number of cities across the North East of England, where diversity differences were even  
320 noticed “*only 2-miles down the road you’ve got an entirely different community living there and*  
321 *they’ll most likely need different approaches to people living 2-miles the other direction*” (Participant  
322 6). Another pharmacist acknowledged diversity differences comparing inner-city pharmacies; they  
323 described “*particularly in the North East, like in [name of major city], you can cross the bridge and*  
324 *find communities that are highly populated with Jewish people, or you can cross another bridge and*  
325 *find areas even more diverse again, like housing for refugees or asylum seekers from War torn*  
326 *countries*” (Participant 6). There was also suggestion that pharmacies located in areas of higher  
327 deprivation contained a greater population of ethnic minority patients. One pharmacist discussed  
328 noticing diversity variations between two pharmacies they worked at with “*different sort of socio-*  
329 *economic areas between [names of two villages]*” (Participant 7). As well, a participant who worked  
330 in Scotland suggested “*where I work, [name of city], it’s like an affluent rural area... so I would say*  
331 *predominantly the community is Caucasian, middle class people*” (Participant 4).

332

### 333 *Questioning the inclusivity of pharmacy services*

334 There was variation between participant perspectives on whether their pharmacy services  
335 demonstrated inclusivity towards patients from ethnic minority groups. Most participants believed  
336 their pharmacy services could better appreciate a person’s culture when providing care. One

337 pharmacy technician stated *“I think people are polite (pause), generally. But I don’t think there’s*  
338 *anything in place to first recognise a patient’s cultural needs and then go from there”* (Participant 8).

339

340 Approaches that could improve the inclusivity of pharmacy services were discussed, with many  
341 relating to language and the need for translators or interpreters to support conversations about  
342 medicines. Translation and interpreter services were recognised as a potentially beneficial  
343 pharmacy service for patients who do not speak English as *“a lot of information that we give across*  
344 *to patients i.e., patient information leaflets, which are inside and the boxes and everything, well the*  
345 *majority are just in English”* (Participant 7). Another participant, who worked in an area with a higher  
346 level of deprivation, discussed strategies employed in their pharmacy which was managed by a  
347 pharmacist from an ethnic minority background. They described how steps towards being more  
348 culturally inclusive included *“translated medicine instructions on the wall ... sometimes posters are in*  
349 *different languages... I don’t know it just feels different working in that pharmacy compared to your*  
350 *average pharmacy, in that they’re more inclusive”* (Participant 9). It was also acknowledged by  
351 several participants that community pharmacy records *“may not have someone’s ethnicity in the*  
352 *notes that you can see”* (Participant 8) and the benefit of making this information readily accessible  
353 was suggested, to inform decisions made by pharmacy professionals about the best course of  
354 treatment for a patient.

355 *“I’d say we could probably do more, and that’s probably all community*  
356 *pharmacies in general. And it’s even things like having leaflets in a different*  
357 *language available – I mean we can print them off, but do we?... I’m aware of a*  
358 *company that’s er that does prescription transcribing in hundreds of different*  
359 *languages and it’s more accurate than Google Translate. But it’s only a very small*  
360 *number of pharmacies that are using it. But I think the ones that are, it is just so*  
361 *helpful to the patients”* (Participant 10)

362

363 *Gaining trust and forming culturally-respectful relationships*

364

365 Participants reflected on factors that might negatively impact on building culturally-respectful  
366 relationships; for example, the effect of language barriers if a person has limited or low English  
367 language proficiency, or use of colloquialisms when conversing with someone that does not speak  
368 English as a first language. A counter assistant reflected *“where I work you sort of know a lot of the*  
369 *people that come in – they’re like locals so you can have that like joke or bit of a chat with them. And*  
370 *with someone of a different background, you don’t always have that. And er, it can be a bit tricky”*  
371 (Participant 3). In fact, using cultural colloquialisms to build a better rapport with patients was  
372 highlighted by a pharmacist. They stated that within Asian cultures *“they call like ‘Auntie’ and*  
373 *‘Uncle’, they use that language and it’s friendly language instead of ‘Mr or Mrs’. Er, yeah, very*  
374 *friendly terms used to create more of that rapport within the community”* (Participant 9).

375

376 Building trust and establishing culturally-respectful relationships was deemed by one participant to  
377 be potentially more challenging to achieve between a pharmacist and a patient from a different  
378 ethnicity or different culture. The employment of staff members from ethnic minority backgrounds  
379 was recognised as a strategy to overcome this. Many participants reflected on examples they had  
380 witnessed where staff members who spoke languages other than English were asked to speak to  
381 certain patients. One pharmacist stated that their pharmacy had *“quite a few Romanian customers*  
382 *who come in because they know that they can speak to someone in their language. Er, and I think*  
383 *they tell their friends, ‘If you go to this pharmacy, they’ll speak Romanian”* (Participant 1). It was  
384 speculated that this approach could help overcome communication barriers between pharmacy staff  
385 and patients, by enabling inclusive conversations about medicines in a person’s native language.  
386 Further, it was considered that diversity within pharmacy staff may lead to greater patient  
387 satisfaction rates specifically focused on medicines; one participant stated *“so, I know it’s important*



388 *to build a rapport up with someone, but then to be able to have a proper focused conversation*  
389 *understand it from a certain cultural perspective... that's like, that's achieving a proper goal for us"*  
390 (Participant 9). A dispensing assistant echoed this thinking, describing *"when a patient who comes in*  
391 *who's a Sikh, for example, our pharmacist is a Sikh so he can focus on their background and kind of*  
392 *knows where they're coming from when they're asking about if it (their medication) is suitable"*  
393 (Participant 2).

394

395

396 Theme 3: Educating and training cultural competence within the pharmacy profession

397

398 *Perspectives on current cultural competence training*

399 There was a consensus amongst participants involved in this study that their education and training  
400 was lacking in topics encompassing cultural competence and its place within the pharmacy  
401 profession. Some pharmacist participants stated that they remembered receiving some cultural  
402 competence training once they had qualified, but this was included as part of a *"bigger topic such as*  
403 *Equality & Diversity or Protected Characteristics"* within the workplace environment (Participant 7).  
404 These perspectives around the paucity of cultural competence training were shared with other  
405 community pharmacy staff, where one counter assistant stated that *"you just sort of have to deal*  
406 *with it yourself, you don't really get any training on that"* (Participant 3). In fact, there was a  
407 common opinion that due to the lack of cultural competence training within professional teaching, it  
408 was necessary for individuals to educate themselves on cultural competence. One pharmacist  
409 reported *"this thinking wasn't built into our teaching really. It wasn't er something we were taught;*  
410 *it was just a good thing for you to look up in your spare time"* (Participant 1).

411

412 All interviewees regarded cultural competence as a necessary and important skill and all were in  
413 agreement that some form of education should be built into pharmacy staff training. One pharmacy

414 technician stated *“I think whoever you are, if you are talking to members of the public who come into*  
415 *the pharmacy or are someone who speaks to patients, you should have gone through a minimum*  
416 *level of training on cultural competence”* (Participant 8). However, across the different job roles  
417 within community pharmacy, there was a mixed consensus on who should receive cultural  
418 competence training and to what level/depth. Almost all participants felt that cultural competence  
419 training should be provided for counter assistants, with one participant stating *“a person walks in*  
420 *and the first people they’ll speak to is the counter staff”* (Participant 5). It was acknowledged that if  
421 counter assistants were not trained on cultural competence, *“it may affect the treatment of a*  
422 *patient and could potentially impact how much a patient will use the pharmacy or whether they*  
423 *come back or feel comfortable even coming in(to the pharmacy)”* (Participant 1). When discussing  
424 their perspectives, a pharmacy dispenser expressed that pharmacists *“are the main people who are*  
425 *giving advice out so if they’re not competent in what they’re saying (pause), then it’s not going to*  
426 *help the situation”* (Participant 2).

427

428 Despite acknowledging the importance and place of cultural competence training, a number of  
429 participants suggested that the profession of pharmacy, as a whole, has unmet needs around the  
430 training and delivery of culturally competent patient care. One participant mentioned that, following  
431 the Black Lives Matter movement, they have requested additional training on cultural competence  
432 from their employer to improve their knowledge. Another reflected on the growing discussion of  
433 equality and inclusivity in wider society, stating that *“the (COVID-19) pandemic was what brought*  
434 *the whole issue about inequalities to light in my mind, and since then I’ve been thinking about what it*  
435 *means for these patients from other communities”* (Participant 13).

436 *“... I don’t think, personally, as a profession, we’re prepared really. And we don’t*  
437 *have that awareness – I certainly don’t feel like I’m optimally prepared for dealing*  
438 *with situations where I have a lack of knowledge about someone’s ethnic*

439 *background. It's actually something that I've requested at work is some training*

440 *around it" (Participant 5)*

441

442 *Suggestions for the delivery of cultural competence training*

443 Participants gave suggestions on how cultural competence could be incorporated into formalised

444 training for each professional group. The training for counter assistants was described involving

445 *"booklets at the start... which you had to complete, and you had so long to complete them. And if*

446 *you pass them, you're classed as a counter assistant" (Participant 3). The same participant went on*

447 *to mention that "it [cultural competence training] should be in the booklet when you initially start,*

448 *and that should definitely be covered in the booklet" (Participant 3). Another counter assistant held a*

449 *different opinion and suggested that "if it was in a training handbook like where you watch videos*

450 *and answer quizzes, then people maybe wouldn't take it seriously. Er, like people might do the quiz*

451 *and not actually care or take it in as actually being important" (Participant 12). They reflected on the*

452 *potential for variation in the population of each pharmacy, dependent on geographic location, as*

453 *well as postulating a constant, dynamic change in "people living nearby, 'cos those trends of*

454 *communities choosing to live in a certain area might change" (Participant 12). When asked about*

455 *what should be taught within this training, it was proposed that a basic understanding and*

456 *awareness of different cultures should be taught "I think just explaining what it (cultural*

457 *competence) is and maybe an idea on how different backgrounds, you know, different people – their*

458 *views on sort of... pharmacy and medicines and things like that" (Participant 3).*

459

460 There was a suggestion made that it may be beneficial to teach cultural competence training

461 separately within the different professions and tailoring the training towards each professions'

462 specific roles within the pharmacy. A dispenser proposed that *"if everyone's taught separately but*

463 *on the same kind of guidelines, so it (cultural competence training) kind of factors in their different*

464 *job roles... then it's helpful if it's got some examples of what we can do, personally, relevant to us"*

465 (Participant 2).

466

467 Every pharmacist interviewed agreed that cultural competence training should be taught within the

468 undergraduate Masters of Pharmacy (MPharm) degree; however, there were differing perspectives

469 on the value it holds within the degree's curriculum. One pharmacist remarked *"I think it should be*

470 *taught, I think it's core, it's just as important as learning about pregnancy and drugs in pregnancy... it*

471 *needs to be included in the curriculum"* (Participant 5). As well, participants discussed the need for

472 cultural competence to underpin the entirety of their learning, rather than only featuring in one part

473 of the degree. There was a particular emphasis on introducing *"this way of thinking"* from the first

474 year of the degree, with one foundation trainee pharmacist discussing the value in having *"these*

475 *types of discussions or training from like an earlier stage, and from a younger age at university... that*

476 *would be good as opposed to leaving it until you're in the workplace like I am now"* (Participant 14).

477 Whilst other pharmacists recognised its importance, they considered the logistics of integrating

478 cultural competence training within the greater context of the MPharm degree curriculum and

479 acknowledged that there may limited room to include this training. One pharmacist stated that

480 cultural competence training should be *"definitely part of it [the MPharm]. I don't know if I'd say a*

481 *big part. Er (pause) not because it's not important – just thinking more in terms of how you'd fit it all*

482 *in"* (Participant 6).

483

484 Pharmacists offered suggestions on how cultural competence training could be delivered within the

485 MPharm degree. The most frequently mentioned methods considered adopting an integrated

486 approach to teaching, for example through the inclusion of ethnic minority patients within

487 workshops, patient-case examples and observed structured clinical examination (OSCE) stations, as

488 well as exposing students to working with people from ethnic minority communities on placements.



## 513 Discussion

514

515 This study builds on the limited evidence that focuses on the perspectives of community pharmacy  
516 staff surrounding cultural competence training. By exploring the perspectives of members of staff  
517 across the entire skill mix of community pharmacy, this study (i) sheds new light on staff  
518 perspectives on cultural competence training and (ii) offers unique suggestions on how cultural  
519 competence training should be taught and delivered to all members of the community pharmacy  
520 team. This study collected the perspectives from representatives of all community pharmacy staff  
521 members: pharmacists, technicians, dispensers and counter assistant staff; an approach that is  
522 unique to this study with these views previously being under-reported within healthcare research.

523

524 A consistent finding across all interviews reported an increase in the ethnic diversity of people  
525 accessing community pharmacies, hence recognising the greater need for community pharmacy  
526 staff to adopt an inclusive approach towards meeting the needs of their ethnic minority patient  
527 groups. This echoes the findings from previous work<sup>11,23</sup> and has been highlighted even more  
528 following the COVID-19 pandemic.<sup>33-35</sup> Ethnicity-related health inequalities is a well-researched area,  
529 with numerous studies reporting a lack of patient engagement with services and variable treatment  
530 outcomes in patients from ethnic minority groups, compared to their White counterparts.  
531 Multifactorial reasons for this have been recognised, including perceived distrust in the healthcare  
532 system, lower health literacy, limited access to timely care and language barriers;<sup>12,36-38</sup> initial  
533 strategies to overcome such challenges, specifically within community pharmacy, have been  
534 identified in this study.

535

536 Echoing previous studies,<sup>39,40</sup> communication difficulties and language barriers between patients and  
537 healthcare professionals were perceived as a key challenge in achieving inclusive patient care within  
538 community pharmacy settings. Interestingly, encounters with non-English speaking patients were

539 also a major concern amongst other healthcare professional groups.<sup>41</sup> Previous work revealed that  
540 computer-based translational resources were perceived as easily accessible and helpful within  
541 American community pharmacy, but were infrequently used.<sup>42-44</sup> “The Written Medicine,” is a new  
542 UK web-based software which has been developed to tackle this issue through bilingual prescription  
543 labels, including English alongside the person’s native language.<sup>45</sup> Future research should explore the  
544 uptake and utilisation of such software within community pharmacies.

545

546 The use of interpreters was also a recognised approach to overcoming communication difficulties  
547 between patients with Low-English Proficiency and members of the pharmacy team. Interpreters  
548 were also important for providing high quality care to these patients. Although the use of  
549 professional interpreters has been acknowledged as beneficial to facilitate healthcare consultations  
550 within outpatient clinical settings,<sup>46-49</sup> there has been a longstanding historical challenge to accessing  
551 interpreters within community pharmacy.<sup>50-52</sup> Research on facilitating access to interpreters and  
552 exploring pharmacy team experiences with interpreters could result in the sharing of best practice,  
553 to improve culturally competent and medicines-focused communication.

554

555 Whilst participants recognised the significance of cultural competence training, they reported very  
556 little to no experience of having cultural competence training within their professional education.  
557 Results from this study echo the wider literature,<sup>53,54</sup> which recognises the importance of integrating  
558 cultural competency into the training of pharmacy staff. In 2021, the Centre for Pharmacy  
559 Postgraduate Education launched a learning campaign on ‘Culturally competent person-centred  
560 care’, designed for pharmacy professionals.<sup>55</sup> At present, research has yet to be done to evaluate the  
561 impact or uptake of this amongst postgraduate, qualified pharmacists. Further, limited work exists to  
562 explore the perspectives of student and trainee pharmacists on cultural competence within their  
563 initial education and training; future studies should seek to address this to close the gap between  
564 training at undergraduate and postgraduate level.

565

566 A key relationship was identified between participant ethnicity and their views on the importance of  
567 cultural competency, with its training being deemed important by all White participants who were  
568 interviewed. However, two participants who self-reported as being from an ethnic minority group  
569 themselves (from Chinese and Pakistani backgrounds), hinted that cultural competence training  
570 does not necessarily need to be a key part of professional training. Several White participants  
571 stressed the importance of this training as, within their practice, they often worry about  
572 unintentionally using the incorrect language/terminology.<sup>56,57</sup> This study offers a new finding that  
573 White healthcare professionals may regard cultural competence training as more important than  
574 those from ethnic minority backgrounds; further research is needed to explore whether this is the  
575 case and identify reasons why this may exist.

576

577 The researcher acknowledges that there were some limitations in this study. Whilst efforts were  
578 taken to ensure an equal split in job roles amongst the participants, the majority were pharmacists  
579 (n=8). Future studies should seek to further explore the perspectives of the wider roles within  
580 community pharmacy teams. The most common ethnicity among the participants was White, British;  
581 in order to make this study more representative, the perspectives of staff members from  
582 underrepresented ethnic communities need further investigation. In doing so, this may help to  
583 determine if culture plays a part in how cultural competence, and training, is perceived.

584 Perspectives of community pharmacy staff have been reported within this study. Future studies  
585 could investigate the perspectives of underrepresented ethnic patient groups on how they believe  
586 cultural competence training should be delivered to community pharmacy staff, to allow a  
587 cooperative approach to re-evaluating the training strategies.<sup>58</sup> Previous studies have reviewed co-  
588 production and co-design approaches to tailor health services to the needs of its users.<sup>59,60</sup>  
589 Therefore, including the perspectives of people from underrepresented ethnic groups would allow  
590 their lived experiences and suggestions to be considered when formulating and reviewing cultural



591 competence training to community pharmacy staff. Furthermore, research could be widened even  
592 more, by exploring perspectives on how cultural competence teaching can be promoted to address  
593 the needs of other minoritised patient groups.

594

## 595 Researcher positionality and reflexivity statement

596

597 When conducting research on cultural competence and its wider connection to ethnicity, it is  
598 important to acknowledge the positionality and reflexivity of the research team. Authors JMcC, AH,  
599 AT and AR-B recognized their privilege as nonethnic minority UK citizens. Author WML, and patient  
600 champions LS and AKD self-report as being from an ethnic minority community; they ensured  
601 cultural appropriateness and sensitivity throughout the entire research process.

602

603

## 604 Conclusion

605

606 Cultural competence is important for community pharmacy staff to develop, due to the increasing  
607 patient diversity they encounter. As pharmacists and counter assistants are primarily patient-facing  
608 roles, cultural competence training should be an essential part of their professional training.  
609 Interactive, informal teaching to encourage an open-minded attitude towards cultural differences,  
610 was preferred over structured, information-based sessions. Future research may seek to further  
611 explore the integration of cultural competence training with undergraduate pharmacist initial  
612 education and training, as well as postgraduate learning programmes. Research opportunities into  
613 co-production and co-design strategies between trainees and training organisations could improve  
614 the design of cultural competence training. Additionally, the perspectives of patients from ethnic

615 minority communities could provide valuable insight and offer recommendations on the cultural  
616 competence training delivered to pharmacy professionals, and wider.

617 **Declarations**

618

619 **Funding**

620 This work was undertaken as part of a Masters of Pharmacy Undergraduate degree (author JMcC,  
621 supervised by author AR-B); there was no funding for this work.

622

623 **Acknowledgements**

624 The authors would like to thank all of the participants involved in this research; without whom, this  
625 work would not be possible. The authors would also like to thank the wider steering group patient  
626 champions who made this work possible: Manpreet Olk, Evneesh Dhinsa, Samia Fiazei and Jel Nagra.

627

## 628 TABLES

629 *Table 1: Participant demographics*

630

| Participant number | Reported sex | Age range (years) | Staff role within Community Pharmacy | Self-reported ethnicity | Interview format   | Interview duration (minutes, seconds) | Region of practice within UK |
|--------------------|--------------|-------------------|--------------------------------------|-------------------------|--------------------|---------------------------------------|------------------------------|
| 1                  | Female       | 20-29             | Pharmacist                           | White, British          | Video-call (Zoom)  | 42m 38s                               | Northumberland / Tyne & Wear |
| 2                  | Female       | 20-29             | Dispenser                            | White, British          | In-person          | 20m 19s                               | York                         |
| 3                  | Female       | 40-49             | Counter Assistant                    | Mixed-race, British     | Telephone          | 22m 07s                               | Northumberland               |
| 4                  | Female       | 30-39             | Pharmacist                           | White, Scottish         | Telephone          | 39m 52s                               | Glasgow                      |
| 5                  | Female       | 40-49             | Pharmacist                           | White, British          | Video-call (Zoom)  | 52m 22s                               | Northumberland / Tyne & Wear |
| 6                  | Male         | 20-29             | Pharmacist                           | White, British          | Video-call (Zoom)  | 55m 19s                               | Northumberland / Tyne & Wear |
| 7                  | Female       | 30-39             | Pharmacist                           | White, British          | Video-call (Zoom)  | 41m 39s                               | Northumberland               |
| 8                  | Female       | 40-49             | Pharmacy Technician                  | White, British          | Video-call (Teams) | 26m 46s                               | London                       |
| 9                  | Female       | 30-39             | Pharmacist                           | Chinese                 | Video-call (Teams) | 32m 22s                               | Northumberland / Tyne & Wear |
| 10                 | Male         | 40-49             | Pharmacist                           | Pakistani               | Video-call (Zoom)  | 23m 21s                               | South Yorkshire              |
| 11                 | Male         | 30-39             | Pharmacist                           | Chinese                 | Video-call (Zoom)  | 39m 52s                               | York and London              |
| 12                 | Female       | 20-29             | Counter Assistant                    | White, British          | Telephone          | 22m 41s                               | Northumberland               |
| 13                 | Male         | 20-29             | Dispenser                            | White, British          | Telephone          | 25m 21s                               | Tyne & Wear                  |
| 14                 | Female       | 20-29             | Foundation Trainee Pharmacist        | White, British          | Video-call (Zoom)  | 30m 04s                               | Tyne & Wear                  |

631 **FIGURE LEGENDS**

632 Figure 1: Factors influencing the creation of a culturally competent pharmacy profession: developed  
633 from the perspectives of pharmacy professionals

634

635 **Acknowledgements:** The authors wish to acknowledge and thank the participants that were interviewed as  
636 part of this research; without whom, this work would not have been possible.

637

638 **Data availability statement:** The data that support the findings of this study are available from the  
639 corresponding author upon reasonable request.

640

641 **Funding statement:** This work was undertaken as part of a Masters of Pharmacy Undergraduate degree  
642 (author JMcC, supervised by author AR-B); there was no funding for this work.

643

644 **Author contributions:** JMcC led on the day-to-day running of the project, data collection and writing of this  
645 manuscript. AR-B and WML oversaw the running of this project as Principal Investigators and provided project  
646 management expertise. AR-B, AH and AT provided qualitative methodological input and expertise. AR-B and  
647 AH supported the recruitment of participants. LS, SV and AKD contributed in their appointment as ethnicity  
648 champions and ensured cultural appropriateness and sensitivity throughout the entire research process. All  
649 authors read, provided comments on, and approved the final manuscript.

650

651 **Conflict of interest disclosure:** None.

652 **Ethics approval statement:** Ethical approval was obtained from the [anonymised] University Research and  
653 Ethics Committee (reference: 25680/2022).

654 **Patient consent statement:** There were no patients involved in this study; it was conducted to gather the  
655 perspectives of healthcare professionals (and signed consent was gained at study enrolment).

656 **Permission to reproduce material from other sources:** Not applicable; this work is original.

657 **Clinical trial registration:** Not applicable.

## 658 References

- 659 1. Handtke O, Schilgen B, Mösko M. Culturally competent healthcare—A scoping review  
660 of strategies implemented in healthcare organizations and a model of culturally  
661 competent healthcare provision. *PLoS One*. 2019;14(7):e0219971.
- 662 2. Greene-Moton E, Minkler M. Cultural competence or cultural humility? Moving  
663 beyond the debate. *Health promotion practice*. 2020;21(1):142-145.
- 664 3. Statistics OfN. *Measuring equality: A guide for the collection and classification of*  
665 *ethnic group, national identity and religion data in the UK*.  
666 <https://www.ons.gov.uk/methodology/classificationsandstandards/measuringequality/ethnicgroupnationalidentityandreligion>; Office for National Statistics;2021.
- 668 4. Derrington SF, Paquette E, Johnson KA. Cross-cultural interactions and shared  
669 decision-making. *Pediatrics*. 2018;142(Supplement\_3):S187-S192.
- 670 5. Robinson AE, M.; Todd, A.; Husband, A. A qualitative exploration of the barriers and  
671 facilitators affecting ethnic minority patient groups when accessing medicine review  
672 services: perspectives of healthcare professionals. *Health Expectations*. 2021.
- 673 6. Kaihlanen A-M, Hietapakka L, Heponiemi T. Increasing cultural awareness:  
674 qualitative study of nurses' perceptions about cultural competence training. *BMC*  
675 *nursing*. 2019;18(1):1-9.
- 676 7. Council GP. *Standards for pharmacy professionals*.  
677 [https://www.pharmacyregulation.org/sites/default/files/standards\\_for\\_pharmacy\\_p](https://www.pharmacyregulation.org/sites/default/files/standards_for_pharmacy_professionals_may_2017_0.pdf)  
678 [rofessionals\\_may\\_2017\\_0.pdf](https://www.pharmacyregulation.org/sites/default/files/standards_for_pharmacy_professionals_may_2017_0.pdf) 2017 2017.
- 679 8. Council GM. *Equality, diversity and inclusion policy*. [https://www.gmc-](https://www.gmc-uk.org/about/how-we-work/equality-diversity-and-inclusion)  
680 [uk.org/about/how-we-work/equality-diversity-and-inclusion](https://www.gmc-uk.org/about/how-we-work/equality-diversity-and-inclusion) 2022 2022.
- 681 9. NationalInstituteForHealthandCareExcellence(NICE). *Community pharmacies:*  
682 *promoting health and wellbeing*. <https://www.nice.org.uk/guidance/ng1022018>.
- 683 10. Robinson A, Sile L, Govind T, et al. 'He or she maybe doesn't know there is such a  
684 thing as a review': A qualitative investigation exploring barriers and facilitators to  
685 accessing medication reviews from the perspective of people from ethnic minority  
686 communities. *Health Expectations*. 2022.
- 687 11. Robinson A, O'Brien N, Sile L, et al. Recommendations for community pharmacy to  
688 improve access to medication advice for people from ethnic minority communities: A  
689 qualitative person-centred codesign study. *Health Expectations*. 2022;25(6):3040-  
690 3052.
- 691 12. Chauhan A, Walton M, Manias E, et al. The safety of health care for ethnic minority  
692 patients: a systematic review. *International journal for equity in health*. 2020;19(1):1-  
693 25.
- 694 13. Bakullari A, Metersky ML, Wang Y, et al. Racial and ethnic disparities in healthcare-  
695 associated infections in the United States, 2009–2011. *Infection Control & Hospital*  
696 *Epidemiology*. 2014;35(S3):S10-S16.
- 697 14. Govere L, Govere EM. How effective is cultural competence training of healthcare  
698 providers on improving patient satisfaction of minority groups? A systematic review  
699 of literature. *Worldviews on Evidence-Based Nursing*. 2016;13(6):402-410.
- 700 15. Oikarainen A, Mikkonen K, Kenny A, et al. Educational interventions designed to  
701 develop nurses' cultural competence: A systematic review. *International journal of*  
702 *nursing studies*. 2019;98:75-86.

- 703 16. O'Brien E-M, O'Donnell C, Murphy J, O'Brien B, Markey K. Intercultural readiness of  
704 nursing students: An integrative review of evidence examining cultural competence  
705 educational interventions. *Nurse education in practice*. 2021;50:102966.
- 706 17. Vella E, White VM, Livingston P. Does cultural competence training for health  
707 professionals impact culturally and linguistically diverse patient outcomes? A  
708 systematic review of the literature. *Nurse Education Today*. 2022:105500.
- 709 18. Debiasi LB, Selleck CS. CULTURAL COMPETENCE TRAINING FOR PRIMARY CARE  
710 NURSE PRACTITIONERS: AN INTERVENTION TO INCREASE CULTURALLY COMPETENT  
711 CARE. *Journal of Cultural Diversity*. 2017;24(2).
- 712 19. Claramita M, Arininta N, Fathonah Y, Kartika S, Prabandari YS, Pramantara IDP. A  
713 partnership-oriented and culturally-sensitive communication style of doctors can  
714 impact the health outcomes of patients with chronic illnesses in Indonesia. *Patient  
715 Education and Counseling*. 2020;103(2):292-300.
- 716 20. Patel MR, Song PX, Bruzzese J-M, et al. Does cross-cultural communication training  
717 for physicians improve pediatric asthma outcomes? A randomized trial. *Journal of  
718 asthma*. 2019;56(3):273-284.
- 719 21. Ladha R, Neiterman E. Shades of care: Understanding the needs of racially and  
720 ethnically diverse paediatric patients, their families, and health care providers in  
721 North America. *Journal of child health care*. 2021:13674935211041863.
- 722 22. Forsyth CJ, Irving MJ, Tennant M, Short SD, Gilroy JA. Teaching cultural competence  
723 in dental education: a systematic review and exploration of implications for  
724 indigenous populations in Australia. *Journal of Dental Education*. 2017;81(8):956-  
725 968.
- 726 23. Curley LE, Moody J, Gobarani R, et al. Is there potential for the future provision of  
727 triage services in community pharmacy? *Journal of pharmaceutical policy and  
728 practice*. 2016;9:1-22.
- 729 24. Zweber A. Cultural competence in pharmacy practice. *American Journal of  
730 Pharmaceutical Education*. 2002;66(2):172-176.
- 731 25. Amin MEK, Chewing B. Predicting pharmacists' adjustment of medication regimens  
732 in Ramadan using the Theory of Planned Behavior. *Research in Social and  
733 Administrative Pharmacy*. 2015;11(1):e1-e15.
- 734 26. Tong A, Sainsbury P, Craig J. Consolidated criteria for reporting qualitative research  
735 (COREQ): a 32-item checklist for interviews and focus groups. *International Journal  
736 for Quality in Health Care*. 2007;19(6):349-357.
- 737 27. Braun V, Clarke V. Reflecting on reflexive thematic analysis. *Qualitative Research in  
738 Sport, Exercise and Health*. 2019;11(4):589-597.
- 739 28. Braun V, Clarke V. What can "thematic analysis" offer health and wellbeing  
740 researchers? *Int J Qual Stud Health Well-being*. 2014;9:26152-26152.
- 741 29. Malterud K, Siersma VD, Guassora AD. Sample Size in Qualitative Interview Studies:  
742 Guided by Information Power. *Qualitative Health Research*. 2015;26(13):1753-1760.
- 743 30. Burton J, Nandi A, Platt L. Measuring ethnicity: challenges and opportunities for  
744 survey research. *Ethnic and Racial Studies*. 2010;33(8):1332-1349.
- 745 31. Health Nlo. *Racial and Ethnic Categories and Definitions for NIH Diversity Programs  
746 and for Other Reporting Purposes*. [https://grants.nih.gov/grants/guide/notice-  
747 files/not-od-15-089.html](https://grants.nih.gov/grants/guide/notice-files/not-od-15-089.html); National Institutes of Health (NIH);2015.

- 748 32. Angelsen A, Lund JF. Designing the household questionnaire. *Measuring Livelihoods*  
749 *and Environmental Dependence, Methods for Research and Fieldworks*. 2011:107-  
750 126.
- 751 33. Hess K, Bach A, Won K, Seed SM. Community pharmacists roles during the COVID-19  
752 pandemic. *Journal of Pharmacy Practice*. 2022;35(3):469-476.
- 753 34. Hedima EW, Adeyemi MS, Ikunaiye NY. Community Pharmacists: On the frontline of  
754 health service against COVID-19 in LMICs. *Research in Social and Administrative*  
755 *Pharmacy*. 2021;17(1):1964-1966.
- 756 35. Visacri MB, Figueiredo IV, de Mendonça Lima T. Role of pharmacist during the  
757 COVID-19 pandemic: a scoping review. *Research in social and administrative*  
758 *pharmacy*. 2021;17(1):1799-1806.
- 759 36. Adini B. Ethnic inequality within the elderly population in utilizing healthcare  
760 services. *Israel Journal of Health Policy Research*. 2019;8:1-4.
- 761 37. Nazroo JY, Falaschetti E, Pierce M, Primatesta P. Ethnic inequalities in access to and  
762 outcomes of healthcare: analysis of the Health Survey for England. *J Epidemiol*  
763 *Community Health*. 2009;63(12):1022-1027.
- 764 38. Nazroo JY, Williams DR. The social determination of ethnic/racial inequalities in  
765 health. *Social determinants of health*. 2006;2:238-266.
- 766 39. Mohammad A, Saini B, Chaar BB. Exploring culturally and linguistically diverse  
767 consumer needs in relation to medicines use and health information within the  
768 pharmacy setting. *Res Social Adm Pharm*. 2015;11(4):545-559.
- 769 40. Mohammad A, Saini B, Chaar BB. Pharmacists' experiences serving culturally and  
770 linguistically diverse patients in the Australian community pharmacy setting.  
771 *International Journal of Clinical Pharmacy*. 2021;43(6):1563-1573.
- 772 41. Ali PA, Watson R. Language barriers and their impact on provision of care to patients  
773 with limited English proficiency: Nurses' perspectives. *Journal of clinical nursing*.  
774 2018;27(5-6):e1152-e1160.
- 775 42. Zargarzadeh AH, Law AV. Access to multilingual prescription labels and verbal  
776 translation services in California. *Research in Social and Administrative Pharmacy*.  
777 2011;7(4):338-346.
- 778 43. Sharif I, Lo S, Ozuah PO. Availability of Spanish prescription labels. *Journal of health*  
779 *care for the poor and underserved*. 2006;17(1):65-69.
- 780 44. Weiss L, Gany F, Rosenfeld P, et al. Access to multilingual medication instructions at  
781 New York City pharmacies. *Journal of Urban Health*. 2007;84(6):742-754.
- 782 45. Herrera H, Alsaif M, Khan G, Barnes N, Rutter P. Provision of bilingual dispensing  
783 labels to non-native English speakers: An exploratory study. *Pharmacy*. 2019;7(1):32.
- 784 46. Flores G. The impact of medical interpreter services on the quality of health care: a  
785 systematic review. *Med Care Res Rev*. 2005;62(3):255-299.
- 786 47. Kirmayer LJ, Narasiah L, Munoz M, et al. Common mental health problems in  
787 immigrants and refugees: general approach in primary care. *Cmaj*.  
788 2011;183(12):E959-E967.
- 789 48. Diamond L, Izquierdo K, Canfield D, Matsoukas K, Gany F. A systematic review of the  
790 impact of patient–physician non-English language concordance on quality of care  
791 and outcomes. *Journal of General Internal Medicine*. 2019;34:1591-1606.
- 792 49. Karliner LS, Jacobs EA, Chen AH, Mutha S. Do professional interpreters improve  
793 clinical care for patients with limited English proficiency? A systematic review of the  
794 literature. *Health Serv Res*. 2007;42(2):727-754.



- 795 50. Bellamy K, Ostini R, Martini N, Kairuz T. Access to medication and pharmacy services  
796 for resettled refugees: a systematic review. *Australian Journal of Primary Health*.  
797 2015;21(3):273-278.
- 798 51. Bellamy K, Ostini R, Martini N, Kairuz T. Seeking to understand: Using generic  
799 qualitative research to explore access to medicines and pharmacy services among  
800 resettled refugees. *International journal of clinical pharmacy*. 2016;38(3):671-675.
- 801 52. Qudah B, Thakur T, Chewning B. Factors influencing patient participation in  
802 medication counseling at the community pharmacy: A systematic review. *Research*  
803 *in Social and Administrative Pharmacy*. 2021;17(11):1863-1876.
- 804 53. Rockich-Winston N, Wyatt TR. The case for culturally responsive teaching in  
805 pharmacy curricula. *American journal of pharmaceutical education*. 2019;83(8).
- 806 54. Sales I, Jonkman L, Connor S, Hall D. A comparison of educational interventions to  
807 enhance cultural competency in pharmacy students. *American journal of*  
808 *pharmaceutical education*. 2013;77(4).
- 809 55. (CPPE) CfPPE. 'Seeing you better: Culturally competent person-centred care  
810 campaign' now live. CPPE.  
811 [https://www.cppe.ac.uk/wizard/files/enews/20210917%20newsletter%20-%20%20-%20](https://www.cppe.ac.uk/wizard/files/enews/20210917%20newsletter%20-%20%20-%20cultural%20competence%20campaign%20launches.html)  
812 [cultural%20competence%20campaign%20launches.html](https://www.cppe.ac.uk/wizard/files/enews/20210917%20newsletter%20-%20%20-%20cultural%20competence%20campaign%20launches.html). Published 2021.  
813 Accessed 24/2/23, 2023.
- 814 56. Kai J, Beavan J, Faul C, Dodson L, Gill P, Beighton A. Professional uncertainty and  
815 disempowerment responding to ethnic diversity in health care: a qualitative study.  
816 *PLoS medicine*. 2007;4(11):e323.
- 817 57. Markey K, Tilki M, Taylor G. Understanding nurses' concerns when caring for patients  
818 from diverse cultural and ethnic backgrounds. *Journal of clinical nursing*. 2018;27(1-  
819 2):e259-e268.
- 820 58. Redman S, Greenhalgh T, Adedokun L, Staniszewska S, Denegri S, Committee C-  
821 poKCS. Co-production of knowledge: the future. In: British Medical Journal  
822 Publishing Group; 2021.
- 823 59. Robert G, Cornwell J, Locock L, Purushotham A, Sturmev G, Gager M. Patients and  
824 staff as codesigners of healthcare services. *BMJ : British Medical Journal*.  
825 2015;350:g7714.
- 826 60. Robert G, Donetto S, Williams O. Co-designing Healthcare Services with Patients. In:  
827 Loeffler E, Bovaird T, eds. *The Palgrave Handbook of Co-Production of Public Services*  
828 *and Outcomes*. Cham: Springer International Publishing; 2021:313-333.  
829

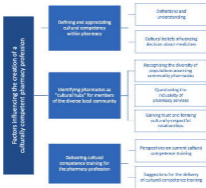

Figure 2. Factors influencing the creation of a culturally competent pharmacy profession, developed from the experiences of pharmacy professionals
